# Supplementary material
Source: MDPI journal article supplement (https://www.mdpi.com/2673-5318/3/2/12)
Supplement: s1 [file s1]

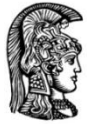

**Έντυπο Συγκατάθεσης Ασθενούς για τη Συμμετοχή στην Έρευνα  
με Τίτλο:**

***«Διερεύνηση της μοναξιάς και της κοινωνικής στήριξης σε ασθενείς που  
πάσχουν από Διαταραχές Πρόσληψης Τροφής».***

Έχετε προσκληθεί να συμμετάσχετε στην παραπάνω έρευνα που διεξάγεται από την Ελένη Μακρή, τελειόφοιτη φοιτήτρια στο Πρόγραμμα Μεταπτυχιακών Σπουδών «Προαγωγή Ψυχικής Υγείας – Πρόληψη Ψυχιατρικών Διαταραχών» της Ιατρικής Σχολής του Ε.Κ.Π.Α, υπό την επίβλεψη του Αναπληρωτή Καθηγητή Ψυχιατρικής, Ιωάννη Μιχόπουλου, η οποία πραγματοποιείται στο ΠΓΝ «ΑΤΤΙΚΟΝ» και το Αιγινήτειο Νοσοκομείο με τη συνεργασία των Β' & Α' Πανεπιστημιακών Ψυχιατρικών Κλινικών.

Το έντυπο που κρατάτε στα χέρια σας θα σας δώσει πληροφορίες για την έρευνα προκειμένου να μπορέσετε ενημερωμένα να αποφασίσετε για το αν θα συμμετέχετε ή όχι σε αυτή την έρευνα.

Σας παρακαλούμε να αφιερώσετε όσο χρόνο χρειάζεστε για να το διαβάσετε, να το σκεφτείτε και να κάνετε όποιες ερωτήσεις θέλετε είτε τώρα είτε κάποια άλλη στιγμή/ανά πάσα στιγμή. Αν αποφασίσετε να συμμετάσχετε, θα σας ζητηθεί να υπογράψετε αυτό το έντυπο και θα λάβετε ένα αντίγραφο.

**1. ΠΟΙΟΣ ΕΙΝΑΙ Ο ΣΚΟΠΟΣ ΤΗΣ ΕΡΕΥΝΑΣ;**

Ο σκοπός αυτής της έρευνας είναι να διερευνήσει τα συναισθήματα μοναξιάς και την κοινωνική στήριξη σε ασθενείς που πάσχουν από Διαταραχές Πρόσληψης Τροφής. Για το σκοπό αυτό θα αξιοποιηθεί μια σειρά ερωτηματολογίων, τα οποία και καλείστε να συμπληρώσετε.

**2. ΠΟΙΟΣ ΩΦΕΛΕΙΤΑΙ ΑΠΟ ΤΗΝ ΕΡΕΥΝΑ; Ή ΕΧΩ ΚΑΠΟΙΟ ΟΦΕΛΟΣ ΑΠΟ ΤΗ ΣΥΜΜΕΤΟΧΗ ΜΟΥ ΣΤΗΝ ΕΡΕΥΝΑ;**

Δεν υπάρχουν κάποια άμεσα οφέλη για σας από τη συμμετοχή σας στην έρευνα αυτή. Ωστόσο, η συμβολή σας στη μελέτη είναι σημαντική, γιατί ελπίζουμε ότι,

διεξάγοντας τη συγκεκριμένη μελέτη, θα συνεισφέρουμε στην προσπάθεια διεύρυνσης της επιστημονικής γνώσης γύρω από τις Διαταραχές Πρόσληψης Τροφής.

### **3. ΥΠΑΡΧΟΥΝ ΚΙΝΔΥΝΟΙ (Η ΚΟΣΤΟΣ/ΕΠΙΒΑΡΥΝΣΗ) ΑΠΟ ΤΗ ΣΥΜΜΕΤΟΧΗ ΜΟΥ ΣΤΗΝ ΕΡΕΥΝΑ;**

Η συμμετοχή σας στην έρευνα δεν συνεπάγεται κάποιο κόστος ή επιβάρυνση και δεν υπάρχουν κίνδυνοι για εσάς.

### **4. ΥΠΟΧΡΕΟΥΜΑΙ ΝΑ ΣΥΜΜΕΤΑΣΧΩ;**

Η συμμετοχή σας στην έρευνα είναι απολύτως εθελοντική. Μπορείτε να αρνηθείτε να συμμετάσχετε χωρίς καμία αιτιολογία ή δικαιολογία. Αν όμως δεχτείτε να συμμετάσχετε σας παρακαλούμε να διαβάσετε προσεκτικά το έντυπο που έχετε στα χέρια σας, να το κρατήσετε και να υπογράψετε το έντυπο συναίνεσης.

Ακόμη και αφού δεχτείτε να συμμετάσχετε μπορείτε να αλλάξετε γνώμη ανά πάσα στιγμή και να αποχωρήσετε από την έρευνα χωρίς καμία αιτιολογία ή δικαιολογία και χωρίς καμία συνέπεια για σας. Σε αυτή την περίπτωση μπορείτε να ζητήσετε να διαγραφούν τα δεδομένα και οι πληροφορίες που έχουμε συλλέξει για σας.

Τα προσωπικά σας δεδομένα μπορούν να διαγραφούν ανά πάσα στιγμή. Στην περίπτωση που επιθυμείτε να διαγραφούν τα προσωπικά σας δεδομένα ή οι πληροφορίες που μας δώσατε μπορείτε να επικοινωνήσετε με την Ελένη Μακρή στην ακόλουθη ηλεκτρονική διεύθυνση:  

### **5. ΠΩΣ ΘΑ ΔΙΑΦΥΛΑΧΘΕΙ Η ΙΔΙΩΤΙΚΟΤΗΤΑ ΜΟΥ;**

Οι πληροφορίες που θα μας δώσετε θα ανωνυμοποιηθούν με τέτοιο τρόπο ώστε να μην είναι δυνατόν να αποκαλυφθεί η ταυτότητά σας σε τρίτους. Επίσης, η ταυτότητά σας δεν θα αποκαλυφθεί σε πιθανές δημοσιεύσεις, παρουσιάσεις ή επιστημονικές αναφορές που θα προκύψουν από τη συγκεκριμένη μελέτη.

Τα μέλη της ερευνητικής ομάδας δεσμεύονται ότι θα τηρήσουν την εμπιστευτικότητα όλων των πληροφοριών που θα μας δώσετε. Αν και θα ζητήσουμε από τους λοιπούς συμμετέχοντες να μην αποκαλύψουν πληροφορίες που θα έρθουν σε γνώση τους στο πλαίσιο της έρευνας δεν μπορούμε να εγγυηθούμε την τήρηση της εμπιστευτικότητας από όλους. Προκειμένου όμως να διασφαλίσουμε κατά το δυνατόν την τήρηση της εμπιστευτικότητας εκ μέρους όλων σας καλούμε να δεσμευτείτε α) ότι δεν θα αποκαλύψετε πληροφορίες που ήρθαν σε γνώση σας στο πλαίσιο της συγκεκριμένης έρευνας β) ακόμη κι αν κοινοποιήσετε ή χρησιμοποιήσετε πληροφορίες που ήρθαν σε

γνώση σας στο πλαίσιο της συγκεκριμένης έρευνας δεν θα αναφέρετε ούτε το όνομα ούτε άλλα στοιχεία της ταυτότητας των άλλων προσώπων που συμμετείχαν στην έρευνα και γ) δεν θα αναφέρετε ότι λάβατε αυτές τις πληροφορίες κατά τη συμμετοχή σας στην εν λόγω έρευνα.

Αποτελέσματα αυτής της έρευνας ενδέχεται να χρησιμοποιηθούν σε επιστημονικές δημοσιεύσεις ή ανακοινώσεις σε συνέδρια. Τα αποτελέσματα θα παρουσιαστούν σε συνοπτική μορφή και το όνομα ή η ταυτότητά σας δεν θα μπορούν να προσδιοριστούν σε καμία δημοσίευση ή συνεδριακή ανακοίνωση.

**6. ΜΕ ΠΟΙΟΝ ΜΠΟΡΩ ΝΑ ΕΠΙΚΟΙΝΩΝΗΣΩ ΓΙΑ ΠΕΡΙΣΣΟΤΕΡΕΣ ΠΛΗΡΟΦΟΡΙΕΣ ΣΧΕΤΙΚΑ ΜΕ ΤΗΝ ΕΡΕΥΝΑ;**

Για περισσότερες πληροφορίες σχετικά με την έρευνα μπορείτε να επικοινωνήσετε με την Ελένη Μακρή στην ηλεκτρονική διεύθυνση:

Ο/Η υπογράφων/ουσα

(Υπογραφή)

Ονοματεπώνυμο .....

Ον. Πατρός .....

## Ερωτηματολόγιο Δημογραφικών Στοιχείων

1. Φύλο: Άνδρας ☐ Γυναίκα ☐ Άλλο ☐ Προτιμώ να μην αναφέρω ☐

2. Ηλικία (σε έτη): .....

### 3. Εκπαίδευση:

Απόφοιτος/η δημοτικού ☐ Απόφοιτος/η γυμνασίου ☐ Απόφοιτος/η λυκείου ☐

Φοιτητής/τρια  
προπτυχιακού επιπέδου ☐ Πτυχιούχος ΑΕΙ/ΤΕΙ ☐ Κάτοχος μεταπτυχιακού  
διπλώματος ειδίκευσης ☐

Κάτοχος διδακτορικού τίτλου ☐ Άλλο: .....

### 4. Απασχόληση:

Δημόσιος Υπάλληλος ☐ Ιδιωτικός Υπάλληλος ☐ Φοιτητής/Σπουδαστής ☐

Ελεύθ. Επαγγελματίας ☐ Οικιακά ☐ Άνεργος/η ☐

Συνταξιούχος ☐ Άλλο: .....

### 5. Οικογενειακή κατάσταση:

Ελεύθερος/η..... ☐

Σε συντροφική σχέση..... ☐

Παντρεμένος/η..... ☐

Άλλο: .....

Παιδιά: Ναι ☐ Όχι ☐

### 6. Μένω (με):

Γονείς ☐ Σύζυγο ☐ Σύζυγο & Παιδιά ☐

Σύντροφο ☐ Μόνος/η ☐ Άλλο: .....

### 7. Η πανδημία του κορωνοϊού στην Ελλάδα με έχει επηρεάσει ψυχολογικά:

Καθόλου ☐ Κάπως ☐ Μέτρια ☐ Αρκετά ☐ Πάρα Πολύ ☐

# EDE-Q

**Οδηγίες:** Οι παρακάτω ερωτήσεις αφορούν τις προηγούμενες τέσσερις εβδομάδες (28 μέρες) μόνο. Παρακαλώ να διαβάσετε κάθε ερώτηση προσεκτικά. Παρακαλώ να απαντήσετε σε όλες τις ερωτήσεις. Ευχαριστώ.

**Ερωτήσεις 1-12:** Παρακαλώ να κυκλώσετε τον κατάλληλο αριθμό στα δεξιά. Να θυμάστε ότι η ερώτηση αναφέρεται στις προηγούμενες τέσσερις εβδομάδες (28 μέρες) μόνο.

| Σε πόσες από τις προηγούμενες 28 ημέρες...                                                                                                                                                    | Καμία μέρα | 1-5 μέρες | 6- 12 μέρες | 13-15 μέρες | 16-22 μέρες | 23-27 μέρες | Κάθε μέρα |
|-----------------------------------------------------------------------------------------------------------------------------------------------------------------------------------------------|------------|-----------|-------------|-------------|-------------|-------------|-----------|
| 1. Προσπαθήσατε σκόπιμα να μειώσετε τη ποσότητα φαγητού που τρώτε για να επηρεάσετε το σχήμα ή το βάρος του σώματός σας;                                                                      | 0          | 1         | 2           | 3           | 4           | 5           | 6         |
| 2. Πέρασατε μεγάλα χρονικά διαστήματα (8 ώρες σε εγρήγορση ή και περισσότερες) χωρίς να φάτε απολύτως τίποτα;                                                                                 | 0          | 1         | 2           | 3           | 4           | 5           | 6         |
| 3. Προσπαθήσατε να αποκλείσετε από τη διαίτά σας κάθε φαγητό που σας άρεσε με σκοπό να επηρεάσετε το σχήμα ή το βάρος του σώματός σας (είτε τα καταφέρατε είτε όχι);                          | 0          | 1         | 2           | 3           | 4           | 5           | 6         |
| 4. Προσπαθήσατε να ακολουθήσετε σαφείς κανόνες σε σχέση με τη διατροφή σας (π.χ. ένα όριο θερμίδων) με σκοπό να επηρεάσετε το σχήμα ή το βάρος του σώματός σας (είτε τα καταφέρατε είτε όχι); | 0          | 1         | 2           | 3           | 4           | 5           | 6         |
| 5. Είχατε τη σαφή επιθυμία να έχετε άδειο στομάχι για να επηρεάσετε το σχήμα ή το βάρος του σώματός σας;                                                                                      | 0          | 1         | 2           | 3           | 4           | 5           | 6         |

| Καμία<br>μέρα | 1-5<br>μέρες | 6-12<br>μέρες | 13-15<br>μέρες | 16-22<br>μέρες | 23-27<br>μέρες | Κάθε<br>μέρα |
|---------------|--------------|---------------|----------------|----------------|----------------|--------------|
|---------------|--------------|---------------|----------------|----------------|----------------|--------------|

- |                                                                                                                                                                                                                          |   |   |   |   |   |   |   |
|--------------------------------------------------------------------------------------------------------------------------------------------------------------------------------------------------------------------------|---|---|---|---|---|---|---|
| 6. Είχατε τη σαφή επιθυμία να έχετε εντελώς επίπεδο στομάχι;                                                                                                                                                             | 0 | 1 | 2 | 3 | 4 | 5 | 6 |
| 7. Σκέψεις γύρω από το φαγητό ή τις θερμίδες σας δημιούργησαν δυσκολία στο να συγκεντρωθείτε πάνω σε πράγματα για τα οποία ενδιαφέρεστε (π.χ. να εργαστείτε, να παρακολουθήσετε μία συζήτηση ή να διαβάσετε);            | 0 | 1 | 2 | 3 | 4 | 5 | 6 |
| 8. Σκέψεις γύρω από το σχήμα ή το βάρος του σώματός σας σας δημιούργησαν δυσκολία στο να συγκεντρωθείτε πάνω σε πράγματα για τα οποία ενδιαφέρεστε (π.χ. να εργαστείτε, να παρακολουθήσετε μία συζήτηση ή να διαβάσετε); | 0 | 1 | 2 | 3 | 4 | 5 | 6 |
- 
- |                                                                     |   |   |   |   |   |   |   |
|---------------------------------------------------------------------|---|---|---|---|---|---|---|
| 9. Είχατε σαφή φόβο ότι θα χάσετε τον έλεγχο σε σχέση με το φαγητό; | 0 | 1 | 2 | 3 | 4 | 5 | 6 |
| 10. Είχατε σαφή φόβο ότι ίσως κερδίσετε βάρος;                      | 0 | 1 | 2 | 3 | 4 | 5 | 6 |
| 11. Αισθανθήκατε παχιά / -ύς;                                       | 0 | 1 | 2 | 3 | 4 | 5 | 6 |
| 12. Είχατε δυνατή επιθυμία να χάσετε βάρος;                         | 0 | 1 | 2 | 3 | 4 | 5 | 6 |



**Ερωτήσεις 13-18:** Παρακαλώ, να συμπληρώσετε τον κατάλληλο αριθμό στις στήλες στα δεξιά σας. Να θυμάστε ότι οι ερωτήσεις αναφέρονται μόνο στις προηγούμενες τέσσερις εβδομάδες (28 ημέρες)

Κατά τη διάρκεια των προηγούμενων τεσσάρων εβδομάδων (28 ημέρες)....

13. Κατά τη διάρκεια των περασμένων 28 ημερών πόσες φορές φάγατε κάτι το οποίο άλλοι άνθρωποι θα χαρακτήριζαν ως μια ασυνήθιστα μεγάλη ποσότητα φαγητού (στις συγκεκριμένες συνθήκες);

14. Σε πόσες από τις φορές αυτές είχατε την αίσθηση ότι έχετε χάσει τον έλεγχο σε σχέση με την τροφή που τρώτε (την ώρα που τρώγατε);

15. Κατά τη διάρκεια των περασμένων 28 ημερών, πόσες μέρες σας προέκυψαν τέτοια επεισόδια υπερβολικής κατανάλωσης τροφής (δηλαδή, είχατε καταναλώσει μία ασυνήθιστα μεγάλη ποσότητα τροφής και είχατε αίσθηση απώλειας ελέγχου τη στιγμή εκείνη);

16. Κατά τη διάρκεια των περασμένων 28 ημερών, πόσες φορές προκαλέσατε στον εαυτό σας εμετό σαν μια μέθοδο για να ελέγξετε το σχήμα ή το βάρος του σώματός σας;

17. Κατά τη διάρκεια των περασμένων 28 ημερών, πόσες φορές πήρατε καθαρτικά σαν μια μέθοδο για να ελέγξετε το σχήμα ή το βάρος του σώματός σας;

18. Κατά τη διάρκεια των περασμένων 28 ημερών, πόσες φορές ασκηθήκατε με ψυχαναγκαστικό/καταναγκαστικό τρόπο σαν μια μέθοδο για να ελέγξετε το βάρος, το σχήμα ή την ποσότητα του λίπους του σώματός σας ή για να «κάψετε» θερμίδες;

**Ερωτήσεις 19-21:** Παρακαλώ, κυκλώστε τον κατάλληλο αριθμό. Παρακαλώ να θυμάστε ότι για τις παρακάτω ερωτήσεις ο όρος «υπερφαγία» αναφέρεται σε αυτό που οι άλλοι θα χαρακτήριζαν ως μια ασυνήθιστα μεγάλη ποσότητα τροφής για τις περιστάσεις, συνοδευόμενη από μια αίσθηση απώλειας του ελέγχου σε σχέση με την τροφή που καταναλώνεται.

19. Κατά τη διάρκεια των περασμένων 28 ημερών, πόσες μέρες φάγατε στα κρυφά; Μη συμπεριλάβετε τα περιστατικά υπερφαγίας.

| Καμία μέρα | 1-5 μέρες | 6-12 μέρες | 13-15 μέρες | 16-22 μέρες | 23-27 μέρες | Κάθε μέρα |
|------------|-----------|------------|-------------|-------------|-------------|-----------|
| 0          | 1         | 2          | 3           | 4           | 5           | 6         |

20. Σε πόσες από τις φορές που φάγατε αισθανθήκατε ενοχή (αισθανθήκατε ότι κάνατε λάθος) εξαιτίας των επιπτώσεων του φαγητού για το σχήμα ή το βάρος του σώματός σας; Μη συμπεριλάβετε τα περιστατικά υπερφαγίας.

| Καμία φορά | Μερικές φορές | Λιγότερο από τις μισές φορές | Τις μισές φορές | Περισσότερες από τις μισές φορές | Τις περισσότερες φορές | Κάθε φορά |
|------------|---------------|------------------------------|-----------------|----------------------------------|------------------------|-----------|
| 0          | 1             | 2                            | 3               | 4                                | 5                      | 6         |

| Καθόλου | Ελαφρώς |   | Μέτρια |   | Έντονα |   |
|---------|---------|---|--------|---|--------|---|
| 0       | 1       | 2 | 3      | 4 | 5      | 6 |

21. Κατά τη διάρκεια των περασμένων 28 ημερών, πόσο σας ανησυχούσε το να σας βλέπουν άλλοι άνθρωποι να τρώτε; Μη συμπεριλάβετε τα περιστατικά υπερφαγίας.

**Ερωτήσεις 22-28:** Παρακαλώ, να κυκλώσετε τον κατάλληλο αριθμό στα δεξιά. Να θυμάστε ότι η ερώτηση αναφέρεται στις προηγούμενες τέσσερις εβδομάδες (28 μέρες) μόνο.

| Καθόλου | Ελαφρώς | Μέτρια | Έντονα |
|---------|---------|--------|--------|
|---------|---------|--------|--------|

22. Έχει επηρεάσει το βάρος σας τον τρόπο με τον οποίο σκέφτεστε (κρίνετε) τον εαυτό σας σαν άτομο;

|   |   |   |   |   |   |   |
|---|---|---|---|---|---|---|
| 0 | 1 | 2 | 3 | 4 | 5 | 6 |
|---|---|---|---|---|---|---|

23. Έχει επηρεάσει το σχήμα του σώματός σας τον τρόπο με τον οποίο σκέφτεστε (κρίνετε) τον εαυτό σας σαν άτομο;

|   |   |   |   |   |   |   |
|---|---|---|---|---|---|---|
| 0 | 1 | 2 | 3 | 4 | 5 | 6 |
|---|---|---|---|---|---|---|



|                                                                                                                                                                                                            | Καθόλου | Ελαφρώς | Μέτρια | Έντονα |   |   |   |
|------------------------------------------------------------------------------------------------------------------------------------------------------------------------------------------------------------|---------|---------|--------|--------|---|---|---|
| 24. Πόσο πολύ θα σας αναστάτωνε αν σας ζητούσαν να ζυγίζεστε μία φορά την εβδομάδα (όχι περισσότερο ή λιγότερο συχνά) για τις επόμενες τέσσερις εβδομάδες;                                                 | 0       | 1       | 2      | 3      | 4 | 5 | 6 |
| 25. Πόσο δυσαρεστημένη/ος ήσασταν με το βάρος σας;                                                                                                                                                         | 0       | 1       | 2      | 3      | 4 | 5 | 6 |
| 26. Πόσο δυσαρεστημένη/ος ήσασταν με το σχήμα του σώματός σας;                                                                                                                                             | 0       | 1       | 2      | 3      | 4 | 5 | 6 |
| 27. Πόσο άβολα αισθανθήκατε παρατηρώντας το σώμα σας (π.χ. παρατηρώντας το σχήμα του σώματός σας στο καθρέπτη, στην αντανάκλαση της βιτρίνας ενός καταστήματος, ενώ ξεντυνόσασταν, κάνατε μπάνιο ή ντους); | 0       | 1       | 2      | 3      | 4 | 5 | 6 |
| 28. Πόσο άβολα αισθανθήκατε με το να παρατηρούν άλλοι το σχήμα του σώματός σας ή τη σιλουέτα σας (π.χ. σε κοινά δοκιμαστήρια, ενώ κολυπούσατε ή φορούσατε στενά ρούχα);                                    | 0       | 1       | 2      | 3      | 4 | 5 | 6 |

Πόσο είναι το τωρινό σας βάρος; (Παρακαλώ, να δώσετε την πιο ακριβή σας εκτίμηση.)  
.....

Πόσο είναι το ύψος σας; (Παρακαλώ, να δώσετε την πιο ακριβή σας εκτίμηση.) .....

Αν είστε γυναίκα: Κατά τους προηγούμενους 3-4 μήνες είχατε απώλεια κάποιας περιόδου;  
.....

Αν ναι, πόσες; .....

Παίρνατε αντισυλληπτικά; .....

---

## UCLA loneliness scale

Για τα συναισθήματα μοναξιάς...

Σημειώστε πόσο συχνά νοιώθετε έτσι όπως περιγράφουν οι παρακάτω προτάσεις.

Σημειώστε στα αριστερά \_\_\_\_ της κάθε πρότασης τον αριθμό που αντιστοιχεί στο πόσο συχνά αισθάνεστε έτσι.

| 1    | 2      | 3                | 4     |
|------|--------|------------------|-------|
| Ποτέ | Σπάνια | Μερικές<br>Φορές | Συχνά |

1. \_\_\_\_ Νοιώθω 'ένα' με τους ανθρώπους γύρω μου.
2. \_\_\_\_ Μου λείπουν οι παρέες.
3. \_\_\_\_ Δεν υπάρχει κανένας στον οποίο μπορώ να στραφώ για βοήθεια.
4. \_\_\_\_ Δεν νοιώθω μόνος.
5. \_\_\_\_ Νοιώθω μέρος της παρέας των φίλων μου.
6. \_\_\_\_ Έχω πολλά κοινά στοιχεία με τους φίλους στην παρέα μου.
7. \_\_\_\_ Δεν είμαι κοντά με κανέναν πια.
8. \_\_\_\_ Οι φίλοι μου δεν μοιράζονται τα ενδιαφέροντα και τις ιδέες μου.
9. \_\_\_\_ Είμαι ένα εξωστρεφές άτομο.
10. \_\_\_\_ Υπάρχουν άτομα που τα νοιώθω κοντά μου.
11. \_\_\_\_ Νοιώθω απομονωμένος.
12. \_\_\_\_ Οι κοινωνικές μου σχέσεις είναι επιπόλαιες.
13. \_\_\_\_ Κανένας δεν με ξέρει πραγματικά καλά.
14. \_\_\_\_ Νοιώθω απομονωμένος από τους άλλους γύρω μου.
15. \_\_\_\_ Μπορώ να βρω παρέα όταν το θελήσω.
16. \_\_\_\_ Υπάρχουν άτομα που με καταλαβαίνουν πραγματικά.
17. \_\_\_\_ Είμαι δυστυχισμένος που είμαι τόσο αποτραβηγμένος.
18. \_\_\_\_ Υπάρχουν άνθρωποι γύρω μου αλλά όχι κοντά μου.
19. \_\_\_\_ Υπάρχουν άτομα με τα οποία μπορώ να μιλήσω.
20. \_\_\_\_ Υπάρχουν άτομα στα οποία μπορώ να στραφώ.

## Κλίμακα Κοινωνικής Στήριξης

Το επόμενο μέρος της έρευνας αποτελείται από **6** ερωτήματα που αναφέρονται σε άτομα του περιβάλλοντός σας που σας **βοηθούν και σας υποστηρίζουν στις δύσκολες στιγμές**.

Για κάθε ερώτημα:

α) **στο πρώτο μέρος** να αναφέρετε με τα αρχικά τους (π.χ. ΑΤ, ΒΜ) **όλα εκείνα τα άτομα** που μπορείτε να υπολογίζετε στην βοήθειά τους ότι μπορούν να σας υποστηρίξουν έτσι όπως περιγράφεται στην ερώτηση, και σε παρένθεση να αναφέρετε το είδος της σχέσης που σας συνδέει μαζί τους (π.χ. αδελφός, φίλος). Δίπλα σε κάθε αριθμό να γράψετε τα αρχικά ενός μόνο ατόμου.

β) **στο δεύτερο μέρος** κάθε απάντησης να σημειώσετε το πόσο ικανοποιημένοι είστε από τον βαθμό στον οποίο σας βοηθούν **όλα** τα άτομα αυτά **γενικά, χρησιμοποιώντας την παρακάτω κλίμακα**.

Ικανοποίηση:

|                |                |                |                |                |                |
|----------------|----------------|----------------|----------------|----------------|----------------|
| <b>6</b>       | <b>5</b>       | <b>4</b>       | <b>3</b>       | <b>2</b>       | <b>1</b>       |
| Πολύ           | Αρκετά         | Λίγο           | Λίγο           | Αρκετά         | Πολύ           |
| Ικανοποιημένος | Ικανοποιημένος | Ικανοποιημένος | Δυσανεστημένος | Δυσανεστημένος | Δυσανεστημένος |

**Αν δεν υπάρχει κάποιο άτομο για κάποια από τις παρακάτω καταστάσεις, βάλτε 'Χ' στο 'Κανένας' και στη συνέχεια επιλέξτε το βαθμό ικανοποίησής σας. Το παρακάτω παράδειγμα θα σας βοηθήσει.**

**Όλες οι απαντήσεις είναι εμπιστευτικές και δεν έχει κανένας πρόσβαση εκτός από τον κύριο ερευνητή.**

### Παράδειγμα

Ποιοι είναι εκείνοι που μπορείς να τους εμπιστευτείς πληροφορίες που μπορεί να σε έφερναν σε δύσκολη θέση αν μαθεύονταν;

- α) Κανένας \_\_\_\_\_ 3. ΑΣ (φίλος) 6. \_\_\_\_\_ 9. \_\_\_\_\_
1. TN (αδελφός) 4. ΠΝ (πατέρας) 7. \_\_\_\_\_
2. ΑΜ (φίλος) 5. ΛΑ (εργοδότης) 8. \_\_\_\_\_

β) Ικανοποίηση: 6 5 **4** 3 2 1

**1. Ποιοι είναι εκείνοι που μπορείς να εμπιστευτείς πραγματικά ότι θα αποσπάσουν την προσοχή σου από προβλήματα που σε ανησυχούν και σε στρεσάρουν;**

|               |          |          |          |
|---------------|----------|----------|----------|
| Κανένας _____ | 3. _____ | 6. _____ | 9. _____ |
| 1. _____      | 4. _____ | 7. _____ |          |
| 2. _____      | 5. _____ | 8. _____ |          |

Ικανοποίηση: 6 5 4 3 2 1

**2. Ποιοι είναι εκείνοι που μπορείς να βασιστείς ότι θα σε κάνουν να αισθανθείς πιο χαλαρός όταν βρίσκεσαι κάτω από πίεση;**

|               |          |          |          |
|---------------|----------|----------|----------|
| Κανένας _____ | 3. _____ | 6. _____ | 9. _____ |
| 1. _____      | 4. _____ | 7. _____ |          |
| 2. _____      | 5. _____ | 8. _____ |          |

Ικανοποίηση: 6 5 4 3 2 1

**3. Ποιοι μπορούν να σε αποδεχτούν ολοκληρωτικά, και στις καλές και στις κακές σου στιγμές;**

|               |          |          |          |
|---------------|----------|----------|----------|
| Κανένας _____ | 3. _____ | 6. _____ | 9. _____ |
| 1. _____      | 4. _____ | 7. _____ |          |
| 2. _____      | 5. _____ | 8. _____ |          |

Ικανοποίηση: 6 5 4 3 2 1

**4. Ποιοι είναι εκείνοι που μπορείς να βασιστείς ότι θα σε φροντίσουν, άσχετα από το τι μπορεί να σου συμβαίνει;**

|               |          |          |          |
|---------------|----------|----------|----------|
| Κανένας _____ | 3. _____ | 6. _____ | 9. _____ |
| 1. _____      | 4. _____ | 7. _____ |          |
| 2. _____      | 5. _____ | 8. _____ |          |

Ικανοποίηση: 6 5 4 3 2 1



**5. Ποιοι είναι εκείνοι που μπορείς να βασιστείς ότι θα σε κάνουν να  
νοιώσεις καλύτερα όταν αισθάνεσαι πολύ άσχημα;**

|               |          |          |          |
|---------------|----------|----------|----------|
| Κανένας _____ | 3. _____ | 6. _____ | 9. _____ |
| 1. _____      | 4. _____ | 7. _____ |          |
| 2. _____      | 5. _____ | 8. _____ |          |

Ικανοποίηση: 6 5 4 3 2 1

**6. Ποιοι είναι εκείνοι που μπορείς να βασιστείς ότι θα σε  
παρηγορήσουν όταν αισθάνεσαι πολύ πεσμένος;**

|               |          |          |          |
|---------------|----------|----------|----------|
| Κανένας _____ | 3. _____ | 6. _____ | 9. _____ |
| 1. _____      | 4. _____ | 7. _____ |          |
| 2. _____      | 5. _____ | 8. _____ |          |

Ικανοποίηση: 6 5 4 3 2 1

## BINGE EATING SCALE

(Gormally J., Black S., Daston S., & Rardin D., 1982)

Επιμέλεια μετάφρασης: Φραγκίσκος Γονιδάκης, Μαρία Καραπατσιά

Η Κλίμακα Υπερφαγίας είναι ένα ερωτηματολόγιο 16 θεμάτων το οποίο μετρά την παρουσία συγκεκριμένων συμπεριφορών υπερφαγίας οι οποίες μπορεί να είναι ενδεικτικές μιας διαταραχής πρόσληψης τροφής.

Παρακάτω υπάρχουν ομάδες δηλώσεων οι οποίες αναφέρονται στην συμπεριφορά, στις σκέψεις και σε συναισθηματικές καταστάσεις. Παρακαλώ σημειώστε ποια δήλωση σε κάθε ομάδα περιγράφει καλύτερα αυτό που αισθανόσαστε.

|    |                                                                                                                                                                                |
|----|--------------------------------------------------------------------------------------------------------------------------------------------------------------------------------|
| 1. |                                                                                                                                                                                |
|    | Δεν αισθάνομαι άβολα για το βάρος ή το σώμα μου όταν βρίσκομαι με άλλους ανθρώπους.                                                                                            |
|    | Με απασχολεί το πώς φαίνομαι στους άλλους, αλλά γενικά δεν με κάνει να νιώθω απογοήτευση για τον εαυτό μου.                                                                    |
|    | Αισθάνομαι αμήχανα σχετικά με την εμφάνισή μου και το βάρος μου το οποίο με κάνει να νιώθω απογοήτευση για τον εαυτό μου.                                                      |
|    | Νιώθω πολύ αμήχανα σχετικά με το βάρος μου και συχνά νιώθω έντονη ντροπή και αηδία για τον εαυτό μου. Προσπαθώ να αποφύγω κοινωνικές συναναστροφές εξαιτίας της αμηχανίας μου. |

|    |                                                                                                                                                  |
|----|--------------------------------------------------------------------------------------------------------------------------------------------------|
| 2. |                                                                                                                                                  |
|    | Δεν έχω δυσκολία να φάω αργά με κανονικό τρόπο.                                                                                                  |
|    | Παρότι φαίνεται ότι «καταβροχθίζω» τις τροφές, δεν αισθάνομαι μετά φουσκωμένος/η επειδή έφαγα πολύ.                                              |
|    | Μερικές φορές συνηθίζω να τρώω γρήγορα και μετά αισθάνομαι άβολα φουσκωμένος/η.                                                                  |
|    | Έχω την συνήθεια να καταπίνω λαίμαργα το φαγητό μου χωρίς να το μασάω καλά. Όταν συμβαίνει αυτό συνήθως νιώθω ότι έσκασα επειδή έφαγα πάρα πολύ. |

|    |                                                                                                           |
|----|-----------------------------------------------------------------------------------------------------------|
| 3. |                                                                                                           |
|    | Νοιώθω ικανός/ή να ελέγξω τις διατροφικές παρορμήσεις όταν θέλω.                                          |
|    | Νοιώθω ότι έχω αποτύχει να ελέγξω την διατροφή μου περισσότερο από τον μέσο άνθρωπο.                      |
|    | Νοιώθω εντελώς αβοήθητος/η όταν πρέπει να ελέγξω τις διατροφικές μου παρορμήσεις.                         |
|    | Επειδή νοιώθω τόσο αβοήθητος/η να ελέγξω την διατροφή μου, έχω απελπιστεί να προσπαθώ να είμαι σε έλεγχο. |

|    |                                                                                                                                                     |
|----|-----------------------------------------------------------------------------------------------------------------------------------------------------|
| 4. |                                                                                                                                                     |
|    | Δεν συνηθίζω να τρώω όταν βαριέμαι.                                                                                                                 |
|    | Μερικές φορές τρώω όταν βαριέμαι, αλλά συχνά μπορώ να «απασχολούμαι με κάτι» και να μην σκέφτομαι το φαγητό.                                        |
|    | Έχω συχνά την συνήθεια να τρώω όταν βαριέμαι, αλλά περιστασιακά, μπορώ να ασχοληθώ με κάποια άλλη δραστηριότητα και για να μην σκέφτομαι το φαγητό. |
|    | Έχω μια ισχυρή συνήθεια να τρώω όταν βαριέμαι. Τίποτα δεν φαίνεται να με βοηθάει να σταματήσω την συνήθεια αυτή.                                    |

|    |                                                                                                                                                                                                                                                                                                   |
|----|---------------------------------------------------------------------------------------------------------------------------------------------------------------------------------------------------------------------------------------------------------------------------------------------------|
| 5. |                                                                                                                                                                                                                                                                                                   |
|    | Συνήθως πεινάω όταν τρώω κάτι.                                                                                                                                                                                                                                                                    |
|    | Περιστασιακά, τρώω κάτι παρορμητικά ακόμη και αν δεν πεινάω πραγματικά.                                                                                                                                                                                                                           |
|    | Έχω συχνά την συνήθεια να τρώω φαγητά που μπορεί να μην απολαμβάνω πραγματικά, για να ικανοποιήσω το αίσθημα της πείνας, παρότι σωματικά δεν χρειάζομαι φαγητό.                                                                                                                                   |
|    | Παρότι σωματικά δεν πεινάω, έχω ένα αίσθημα της πείνας στο στόμα μου το οποίο φαίνεται να ικανοποιείται μόνο όταν τρώω μια τροφή, όπως ένα σάντουιτς, που γεμίζει το στόμα μου. Μερικές φορές, όταν τρώω φαγητό που ικανοποιεί την πείνα του στόματός μου, φτύνω το φαγητό για να μην πάρω βάρος. |

|    |                                                                                |
|----|--------------------------------------------------------------------------------|
| 6. |                                                                                |
|    | Δεν νοιώθω καμία ενοχή ή μίσος για τον εαυτό μου όταν τρώω περισσότερο.        |
|    | Όταν τρώω περισσότερο, περιστασιακά νοιώθω ενοχή ή μίσος για τον εαυτό μου.    |
|    | Σχεδόν πάντα αισθάνομαι ενοχή ή μίσος για τον εαυτό μου όταν τρώω περισσότερο. |

|    |                                                                                                                                                                                  |
|----|----------------------------------------------------------------------------------------------------------------------------------------------------------------------------------|
| 7. |                                                                                                                                                                                  |
|    | Δεν χάνω τον απόλυτο έλεγχο της διατροφής μου όταν είμαι σε δίαιτα ακόμα και μετά από περιόδους που έχω παραφάει.                                                                |
|    | Μερικές φορές όταν τρώω «απαγορευμένο φαγητό» και είμαι σε δίαιτα, αισθάνομαι ότι την έχω χαλάσει οπότε τρώω παραπάνω.                                                           |
|    | Συχνά, έχω την συνήθεια όταν παρατρώω και είμαι σε δίαιτα να λέω στο εαυτό μου «τώρα το χάλασες, οπότε γιατί να μην το παρακάνεις». Όταν συμβαίνει αυτό, τρώω ακόμη περισσότερο. |
|    | Έχω συχνά την σταθερή συνήθεια να ξεκινάω αυστηρή δίαιτα, αλλά σπάω την δίαιτα κάνοντας υπερφαγία. Η ζωή μου φαίνεται να είναι είτε «τσιμπούσι» είτε «πείνα».                    |

|    |                                                                                                         |
|----|---------------------------------------------------------------------------------------------------------|
| 8. |                                                                                                         |
|    | Σπάνια τρώω τόσο φαγητό που να αισθάνομαι έπειτα άβολα φουσκωμένος/η.                                   |
|    | Συνήθως μία φορά τον μήνα, τρώω τόση ποσότητα φαγητού, που καταλήγω να αισθάνομαι φουσκωμένος/η.        |
|    | Υπάρχουν συχνές περίοδοι τον μήνα που τρώω μεγάλες ποσότητες φαγητού, είτε στα γεύματα είτε στα σνακ.   |
|    | Τρώω τόσο πολύ φαγητό που συχνά αισθάνομαι κάπως άβολα μετά το φαγητό και μερικές φορές νιώθω αναγούλα. |

|    |                                                                                                                                                                                                        |
|----|--------------------------------------------------------------------------------------------------------------------------------------------------------------------------------------------------------|
| 9. |                                                                                                                                                                                                        |
|    | Οι θερμίδες που λαμβάνω δεν αυξάνονται ή μειώνονται πολύ σε καθημερινή βάση.                                                                                                                           |
|    | Μερικές φορές όταν παραφάω, μετά θα προσπαθήσω να μειώσω τις θερμίδες που λαμβάνω σχεδόν στο μηδέν ώστε να αντισταθμίσω τις παραπάνω θερμίδες που έφαγα.                                               |
|    | Έχω συχνά την συνήθεια να παρατρώω κατά τη διάρκεια της νύχτας. Φαίνεται ότι η ρουτίνα μου είναι να μην πεινάω το πρωί, αλλά να παρατρώω το βράδυ.                                                     |
|    | Ως ενήλικας, έχω μεγάλες περιόδους εβδομάδων που πρακτικά υποσιτίζω τον εαυτό μου. Αυτό γίνεται μετά από περιόδους που τρώω παραπάνω. Φαίνεται ότι ζω μια ζωή είτε του «τσιμπουσιού, είτε της πείνας». |

| 10. |                                                                                                                                                          |
|-----|----------------------------------------------------------------------------------------------------------------------------------------------------------|
|     | Συνήθως μπορώ να σταματήσω να τρώω όταν θέλω. Ξέρω πότε είναι αρκετό.                                                                                    |
|     | Μία στο τόσο νοιώθω μια παρόρμηση να φάω την οποία δεν μπορώ να ελέγξω.                                                                                  |
|     | Συχνά, νοιώθω μια έντονη ορμή να φάω την οποία φαίνεται ότι δεν μπορώ να ελέγξω, αλλά υπάρχουν άλλες φορές που μπορώ να ελέγξω την παρόρμηση για φαγητό. |
|     | Νοιώθω ανίκανο/ης να ελέγξω την ορμή για φαγητό. Έχω τον φόβο ότι δεν είμαι ικανός/ή να σταματήσω από μόνος/η μου να τρώω.                               |

| 11. |                                                                                                                                              |
|-----|----------------------------------------------------------------------------------------------------------------------------------------------|
|     | Δεν έχω κανένα πρόβλημα να σταματήσω να τρώω όταν αισθάνομαι γεμάτος/η.                                                                      |
|     | Συνήθως μπορώ να σταματήσω να τρώω όταν αισθάνομαι γεμάτος/η, αλλά κατά διαστήματα παρατρώω το οποίο με κάνει να αισθάνομαι άβολα γεμάτος/η. |
|     | Έχω δυσκολία να σταματήσω να τρώω όταν ξεκινήσω και συχνά νοιώθω άβολα γεμάτος/η μετά ένα γεύμα.                                             |
|     | Επειδή έχω δυσκολία να σταματήσω να τρώω όταν θέλω, μερικές φορές έχω προκαλέσει εμετό για να ανακουφιστώ από το αίσθημα του φουσκώματος.    |

| 12. |                                                                                                                                                                                                                                                                            |
|-----|----------------------------------------------------------------------------------------------------------------------------------------------------------------------------------------------------------------------------------------------------------------------------|
|     | Φαίνεται ότι τρώω τόσο όσο και όταν είμαι με άλλους( οικογένεια, κοινωνικές συναντήσεις) και όταν είμαι μόνος/η.                                                                                                                                                           |
|     | Μερικές φορές, όταν είμαι με άλλους ανθρώπους, δεν τρώω τόσο όσο θέλω γιατί νοιώθω αμήχανα σχετικά με την κατανάλωση φαγητού.                                                                                                                                              |
|     | Συχνά, τρώω μικρή μερίδα φαγητού όταν είναι και άλλοι παρόντες, επειδή ντρέπομαι για το πώς τρώω.                                                                                                                                                                          |
|     | Αισθάνομαι τόσο ντροπή για την υπερφαγία μου που επιλέγω κάποιες στιγμές για να φάω παραπάνω όταν ξέρω ότι δεν με βλέπει κανείς. Νοιώθω σαν ένας άνθρωπος «που τρώει υγιεινές τροφές μπροστά στους άλλους και ανθυγιεινές τροφές μόνο κρυφά όταν οι άλλοι δεν με βλέπουν». |

| 13. |                                                                                         |
|-----|-----------------------------------------------------------------------------------------|
|     | Τρώω 3 γεύματα την ημέρα με μόνο ένα περιστασιακά σνακ μεταξύ των γευμάτων.             |
|     | Τρώω 3 γεύματα την ημέρα, αλλά επίσης συνήθως τρώω σνακ μεταξύ των γευμάτων.            |
|     | Όταν τρώω πολλά σνακ, συνηθίζω να παραλείπω τα κανονικά γεύματα.                        |
|     | Υπάρχουν συχνές περίοδοι, που φαίνεται ότι τρώω συνεχώς χωρίς προγραμματισμένα γεύματα. |

| 14. |                                                                                                                                                                                 |
|-----|---------------------------------------------------------------------------------------------------------------------------------------------------------------------------------|
|     | Δεν με απασχολεί πολύ το να ελέγξω μη επιθυμητές διατροφικές ορμές.                                                                                                             |
|     | Τουλάχιστον κάποιες φορές, αισθάνομαι ότι η σκέψη μου κολλάει στο πώς να ελέγξω τις διατροφικές μου ορμές.                                                                      |
|     | Αισθάνομαι ότι συχνά περνάω αρκετή ώρα σκεφτόμενος/η πόσο πολύ έφαγα ή προσπαθώντας να μην φάω άλλο.                                                                            |
|     | Φαίνεται ότι τις περισσότερες από τις ώρες που είμαι ξύπνιος/α, είμαι απορροφημένος/η σε σκέψεις σχετικά με το να φάω ή να μην φάω. Αισθάνομαι ότι συνεχώς προσπαθώ να μην φάω. |

| 15. |                                                                                                          |
|-----|----------------------------------------------------------------------------------------------------------|
|     | Δεν δίνω μεγάλη σημασία στο φαγητό.                                                                      |
|     | Έχω μεγάλη λαχτάρα για φαγητό, αλλά διαρκεί μόνο λίγη ώρα.                                               |
|     | Υπάρχουν μέρες που δεν σκέφτομαι τίποτα άλλο από το φαγητό.                                              |
|     | Τις περισσότερες μέρες είμαι απορροφημένος/η σε σκέψεις σχετικά με το φαγητό. Νοιώθω ότι ζω για να τρώω. |

| 16. |                                                                                                                                                                          |
|-----|--------------------------------------------------------------------------------------------------------------------------------------------------------------------------|
|     | Συνήθως ξέρω πότε είμαι οργανικά πεινασμένος/η ή όχι. Τρώω την ακριβή ποσότητα φαγητού που με ικανοποιεί.                                                                |
|     | Κατά περιόδους, νοιώθω αβέβαιος/η για το αν ξέρω αν είμαι σωματικά πεινασμένος/η ή όχι. Τέτοιες στιγμές είναι δύσκολο να καταλάβω πόσο πρέπει να φάω για να ικανοποιηθώ. |
|     | Ακόμα και αν ξέρω πόσες θερμίδες πρέπει να φάω, δεν ξέρω ποια είναι η «κανονική» μερίδα φαγητού για μένα.                                                                |



## Emotional Eating Scale

(Arnow B., Kenardy J., & Agras W. S., 1995)

Επιμέλεια Μετάφρασης: Φραγκίσκος Γονιδάκης, Μαρία Καραπατσιά

Όλοι αντιδρούμε στα διάφορα συναισθήματα με διαφορετικό τρόπο. Κάποια είδη συναισθημάτων προκαλούν στους ανθρώπους μια έντονη ορμή να φάνε. Παρακαλώ σημειώστε σε ποίο βαθμό η καθεμία από τις παρακάτω συναισθηματικές καταστάσεις σας προκαλούν μια έντονη ορμή να φάτε τσεκάροντας το αντίστοιχο κουτάκι.

|                  | Καμία ορμή<br>να φάω | Μικρή ορμή<br>να φάω | Μέτρια ορμή<br>να φάω | Έντονη ορμή<br>να φάω | Πολύ έντονη<br>ορμή να φάω |
|------------------|----------------------|----------------------|-----------------------|-----------------------|----------------------------|
| Πικρία           |                      |                      |                       |                       |                            |
| Αποθάρρυνση      |                      |                      |                       |                       |                            |
| Αδυναμία         |                      |                      |                       |                       |                            |
| Εξάντληση        |                      |                      |                       |                       |                            |
| Ανεπάρκεια       |                      |                      |                       |                       |                            |
| Ενθουσιασμός     |                      |                      |                       |                       |                            |
| Επαναστατικότητα |                      |                      |                       |                       |                            |
| Κατήφεια         |                      |                      |                       |                       |                            |
| Νευρικότητα      |                      |                      |                       |                       |                            |
| Θλίψη            |                      |                      |                       |                       |                            |
| Ανησυχία         |                      |                      |                       |                       |                            |
| Ευερεθιστότητα   |                      |                      |                       |                       |                            |
| Ζήλια            |                      |                      |                       |                       |                            |
| Ανησυχία         |                      |                      |                       |                       |                            |
| Απογοήτευση      |                      |                      |                       |                       |                            |
| Μοναξιά          |                      |                      |                       |                       |                            |
| Οργή             |                      |                      |                       |                       |                            |
| Αγωνία           |                      |                      |                       |                       |                            |
| Σάστισμα         |                      |                      |                       |                       |                            |
| Νευρικότητα      |                      |                      |                       |                       |                            |
| Θυμός            |                      |                      |                       |                       |                            |
| Ενοχή            |                      |                      |                       |                       |                            |
| Βαρεμάρα         |                      |                      |                       |                       |                            |
| Αβοηθητικότητα   |                      |                      |                       |                       |                            |
| Αναστάτωση       |                      |                      |                       |                       |                            |

## Κλίμακα Κόννορ-Ντάβιντσον για την Ανθεκτικότητα (CD-RISC-25)

Αρχικά □□□ AA#□□□□□□ Ημερομηνία□□/□□/□□□□ Επίσκεψη□□ Ηλικία□□

Για κάθε λήμμα παρακαλείσθε να σημειώσετε με ένα 'X' στο τετραγωνάκι το οποίο αντιπροσωπεύει καλύτερα πόσο συμφωνείτε με τις ακόλουθες δηλώσεις όπως συνέβησαν σε εσάς κατά τη διάρκεια του πρόσφατου μηνός. Αν μία συγκεκριμένη κατάσταση δε σας συνέβη πρόσφατα, απαντήστε σύμφωνα με το πώς σκέφτεστε ότι θα είχατε νιώσει.

|                                                                                                                   | Καθόλου<br>αληθές<br>(0) | Σπανίως<br>αληθές<br>(1) | Μερικές<br>φορές<br>αληθές<br>(2) | Συχνά<br>αληθές<br>(3)   | Σχεδόν<br>πάντα<br>αληθές<br>(4) |
|-------------------------------------------------------------------------------------------------------------------|--------------------------|--------------------------|-----------------------------------|--------------------------|----------------------------------|
| 1.Είμαι ικανός να προσαρμόζομαι όταν συμβαίνουν αλλαγές.                                                          | <input type="checkbox"/> | <input type="checkbox"/> | <input type="checkbox"/>          | <input type="checkbox"/> | <input type="checkbox"/>         |
| 2. Έχω τουλάχιστον μία στενή και ασφαλή σχέση που με βοηθάει όταν είμαι αγχωμένος.                                | <input type="checkbox"/> | <input type="checkbox"/> | <input type="checkbox"/>          | <input type="checkbox"/> | <input type="checkbox"/>         |
| 3.Όταν δε διαφαίνονται καθαρές λύσεις στα προβλήματά μου, η Μοίρα ή ο Θεός μπορεί να βοηθήσουν.                   | <input type="checkbox"/> | <input type="checkbox"/> | <input type="checkbox"/>          | <input type="checkbox"/> | <input type="checkbox"/>         |
| 4.Μπορώ να ανταποκριθώ σε οτιδήποτε συμβεί.                                                                       | <input type="checkbox"/> | <input type="checkbox"/> | <input type="checkbox"/>          | <input type="checkbox"/> | <input type="checkbox"/>         |
| 5.Παλαιότερες επιτυχίες μου δίνουν αυτοπεποίθηση στο να ανταποκριθώ σε νέες προκλήσεις και δυσκολίες.             | <input type="checkbox"/> | <input type="checkbox"/> | <input type="checkbox"/>          | <input type="checkbox"/> | <input type="checkbox"/>         |
| 6.Προσπαθώ να δώ την αστεία πλευρά των πραγμάτων όταν αντιμετωπίζω προβλήματα.                                    | <input type="checkbox"/> | <input type="checkbox"/> | <input type="checkbox"/>          | <input type="checkbox"/> | <input type="checkbox"/>         |
| 7. Το να έχω να ανταποκριθώ στο άγχος μπορεί να με κάνει πιο δυνατό.                                              | <input type="checkbox"/> | <input type="checkbox"/> | <input type="checkbox"/>          | <input type="checkbox"/> | <input type="checkbox"/>         |
| 8.Έχω την τάση να συνέρχομαι γρήγορα μετά από ασθένεια, τραυματισμό ή άλλες ταλαιπωρίες.                          | <input type="checkbox"/> | <input type="checkbox"/> | <input type="checkbox"/>          | <input type="checkbox"/> | <input type="checkbox"/>         |
| 9.Είπε καλώς, είτε κακώς, πιστεύω ότι τα περισσότερα πράγματα έχουν λόγο που συμβαίνουν.                          | <input type="checkbox"/> | <input type="checkbox"/> | <input type="checkbox"/>          | <input type="checkbox"/> | <input type="checkbox"/>         |
| 10.Δίνω τον καλύτερο εαυτό μου όποιο κι αν μοιάζει να είναι το αποτέλεσμα.                                        | <input type="checkbox"/> | <input type="checkbox"/> | <input type="checkbox"/>          | <input type="checkbox"/> | <input type="checkbox"/>         |
| 11.Πιστεύω ότι μπορώ να πετύχω τους στόχους μου, ακόμα κι όταν υπάρχουν εμπόδια.                                  | <input type="checkbox"/> | <input type="checkbox"/> | <input type="checkbox"/>          | <input type="checkbox"/> | <input type="checkbox"/>         |
| 12.Ακόμα κι όταν τα πράγματα φαίνονται απέλπιδα, δεν τα παρατάω.                                                  | <input type="checkbox"/> | <input type="checkbox"/> | <input type="checkbox"/>          | <input type="checkbox"/> | <input type="checkbox"/>         |
| 13.Κατά τη διάρκεια περιόδων άγχους/κρίσης, γνωρίζω πού μπορώ να απευθυνθώ για βοήθεια.                           | <input type="checkbox"/> | <input type="checkbox"/> | <input type="checkbox"/>          | <input type="checkbox"/> | <input type="checkbox"/>         |
| 14.Υπό καθυστέρηση πίεσης, παραμένω συγκεντρωμένος και σκέφτομαι καθαρά.                                          | <input type="checkbox"/> | <input type="checkbox"/> | <input type="checkbox"/>          | <input type="checkbox"/> | <input type="checkbox"/>         |
| 15.Προτιμώ να αναλαμβάνω την ευθύνη στη λύση προβλημάτων παρά να αφήνω άλλους να λαμβάνουν όλες τις αποφάσεις.    | <input type="checkbox"/> | <input type="checkbox"/> | <input type="checkbox"/>          | <input type="checkbox"/> | <input type="checkbox"/>         |
| 16.Δεν απογοητεύομαι εύκολα από την αποτυχία.                                                                     | <input type="checkbox"/> | <input type="checkbox"/> | <input type="checkbox"/>          | <input type="checkbox"/> | <input type="checkbox"/>         |
| 17.Θεωρώ τον εαυτό μου ως δυνατό άτομο όταν αντιμετωπίζω τις προκλήσεις και τις δυσκολίες της ζωής.               | <input type="checkbox"/> | <input type="checkbox"/> | <input type="checkbox"/>          | <input type="checkbox"/> | <input type="checkbox"/>         |
| 18.Μπορώ να λαμβάνω μη δημοφιλείς ή δύσκολες αποφάσεις που επηρεάζουν άλλα άτομα, αν είναι απαραίτητο.            | <input type="checkbox"/> | <input type="checkbox"/> | <input type="checkbox"/>          | <input type="checkbox"/> | <input type="checkbox"/>         |
| 19.Είμαι σε θέση να χειρίζομαι δυσάρεστα ή επίπονα συναισθήματα όπως λύπη , φόβο ή θυμό.                          | <input type="checkbox"/> | <input type="checkbox"/> | <input type="checkbox"/>          | <input type="checkbox"/> | <input type="checkbox"/>         |
| 20.Όταν αντιμετωπίζεις τα προβλήματα της ζωής κάποιες φορές πρέπει να ενεργείς διαισθητικά χωρίς να ξέρεις γιατί. | <input type="checkbox"/> | <input type="checkbox"/> | <input type="checkbox"/>          | <input type="checkbox"/> | <input type="checkbox"/>         |
| 21. Έχω ισχυρή αίσθηση σκοπού στη ζωή.                                                                            | <input type="checkbox"/> | <input type="checkbox"/> | <input type="checkbox"/>          | <input type="checkbox"/> | <input type="checkbox"/>         |
| 22.Αισθάνομαι ότι ελέγχω τη ζωή μου.                                                                              | <input type="checkbox"/> | <input type="checkbox"/> | <input type="checkbox"/>          | <input type="checkbox"/> | <input type="checkbox"/>         |
| 23.Μου αρέσουν οι προκλήσεις.                                                                                     | <input type="checkbox"/> | <input type="checkbox"/> | <input type="checkbox"/>          | <input type="checkbox"/> | <input type="checkbox"/>         |
| 24.Προσπαθώ να πετυχαίνω τους στόχους μου, όσα εμπόδια και να αντιμετωπίζω.                                       | <input type="checkbox"/> | <input type="checkbox"/> | <input type="checkbox"/>          | <input type="checkbox"/> | <input type="checkbox"/>         |
| 25.Αισθάνομαι υπερήφανος για τα επιτεύγματά μου.                                                                  | <input type="checkbox"/> | <input type="checkbox"/> | <input type="checkbox"/>          | <input type="checkbox"/> | <input type="checkbox"/>         |

Όλα τα δικαιώματα προστατεύονται. Κανένα τμήμα αυτού του εγγράφου δε μπορεί να αναπαραχθεί ή να μεταδοθεί σε οποιαδήποτε μορφή ή με οποιαδήποτε μέσα, ηλεκτρονικά ή μηχανικά, συμπεριλαμβανομένης της φωτοτύπησης ή από οποιαδήποτε αποθηκευμένη πληροφορία ή σύστημα αναπαραγωγής, χωρίς γραπτή άδεια από τον Dr Davidson στη διεύθυνση [mail@cd-risc.com](mailto:mail@cd-risc.com). Περισσότερες πληροφορίες σχετικά με την κλίμακα και τους όρους χρήσης μπορούν να αναζητηθούν στην τοποθεσία [www.cd-risc.com](http://www.cd-risc.com). Πνευματικά δικαιώματα ©2001,2003,2007,2009,2011 των Kathryn M. Connor, M.d., και Jonathan R.T. Davidson

# Νοσοκομειακή Μέτρηση Άγχους και Κατάθλιψης (HADS)

nferNelson  
understanding potential

Όνομα: \_\_\_\_\_ Ημερομηνία: \_\_\_\_\_

ΔΙΠΛΩΣΤΕ ΕΑΩ

Οι κλινικοί ιατροί είναι σε επίγνωση ότι τα συναισθήματα παίζουν ένα σημαντικό ρόλο στις περισσότερες ασθένειες. Αν ο/η κλινικός/ή ιατρός σας γνωρίζει σχετικά μ' αυτά τα συναισθήματα, θα είναι σε θέση να σας βοηθήσει περισσότερο.

Αυτό το ερωτηματολόγιο είναι σχεδιασμένο ώστε να βοηθήσει τον κλινικό ιατρό σας να γνωρίσει πως αισθάνεστε. Διαβάστε κάθε παρακάτω ερώτημα και **υπογραμμίστε την απάντηση** η οποία είναι πλησιέστερη στα συναισθήματά σας της προηγούμενης εβδομάδας. Αγνωρίστε τους αριθμούς οι οποίοι είναι τυπωμένοι στο περιθώριο του ερωτηματολογίου.

Μην προβληματίζεστε πολύ για τις απαντήσεις σας, η άμεση ανταπόκρισή σας σε κάθε ένα από τα ερωτήματα θα είναι πιθανότατα αντιπροσωπευτικότερη από μία μακρόχρονη και αναλυμένη απάντηση.

ΔΙΠΛΩΣΤΕ ΕΑΩ

| A | D |                                                                                        |                                                                                          | A | D |
|---|---|----------------------------------------------------------------------------------------|------------------------------------------------------------------------------------------|---|---|
|   |   | <b>Νιώθω ανήσυχος ή τρομαγμένος</b>                                                    | <b>Νιώθω σαν να έχουν πέσει οι ρυθμοί μου</b>                                            |   |   |
| 3 |   | Τον περισσότερο καιρό                                                                  | Σχεδόν όλο τον καιρό                                                                     | 3 |   |
| 2 |   | Πολύ καιρό                                                                             | Πολύ συχνά                                                                               | 2 |   |
| 1 |   | Από καιρό σε καιρό, περιστασιακά                                                       | Μερικές φορές                                                                            | 1 |   |
| 0 |   | Καθόλου                                                                                | Καθόλου                                                                                  | 0 |   |
|   |   | <b>Εξακολουθώ να απολαμβάνω τα πράγματα που συνήθιζα να απολαμβάνω</b>                 | <b>Αντιμετωπίζω κάποιο συναίσθημα φόβου σαν να έχω 'πεταλούδες' στο στομάχι μου</b>      |   |   |
| 0 |   | Σαφέστατα, στον ίδιο βαθμό                                                             | Καθόλου                                                                                  | 0 |   |
| 1 |   | Όχι στον ίδιο βαθμό                                                                    | Περιστασιακά                                                                             | 1 |   |
| 2 |   | Λίγο μόνο                                                                              | Αρκετά συχνά                                                                             | 2 |   |
| 3 |   | Καθόλου                                                                                | Πολύ συχνά                                                                               | 3 |   |
|   |   | <b>Αντιμετωπίζω κάποιο συναίσθημα φόβου σαν να πρόκειται κάτι τρομακτικό να συμβεί</b> | <b>Έχασα το ενδιαφέρον για την εμφάνισή μου</b>                                          |   |   |
| 3 |   | Ακριβώς, μάλιστα σε σοβαρό βαθμό                                                       | Ακριβώς                                                                                  | 3 |   |
| 2 |   | Ναι, αλλά όχι τόσο σοβαρά                                                              | Δεν την φροντίζω όσο θα έπρεπε                                                           | 2 |   |
| 1 |   | Ελάχιστα, αλλά δεν μ' ανησυχεί                                                         | Ίσως δεν την φροντίζω όσο θα έπρεπε                                                      | 1 |   |
| 0 |   | Καθόλου                                                                                | Την φροντίζω όπως πάντοτε                                                                | 0 |   |
|   |   | <b>Μπορώ να γελάω και να βλέπω την χαρωπή όψη των πραγμάτων</b>                        | <b>Νιώθω νευρικός κι ανήσυχος, σαν να πρέπει συνέχεια να κινούμαι</b>                    |   |   |
| 0 |   | Βεβαίως, έτσι όπως πάντα μπορούσα                                                      | Μάλιστα σε πολύ μεγάλο βαθμό                                                             | 3 |   |
| 1 |   | Μάλλον όχι τόσο, όπως στο παρελθόν                                                     | Σε αρκετά μεγάλο βαθμό                                                                   | 2 |   |
| 2 |   | Σίγουρα όχι τόσο πολύ                                                                  | Όχι σε τόσο μεγάλο βαθμό                                                                 | 1 |   |
| 3 |   | Καθόλου                                                                                | Καθόλου                                                                                  | 0 |   |
|   |   | <b>Ανήσυχες σκέψεις περνούν από το μυαλό μου</b>                                       | <b>Προσμένω με χαρά διάφορα πράγματα</b>                                                 |   |   |
| 3 |   | Πάρα πολύ καιρό                                                                        | Τόσο όπως και στο παρελθόν                                                               | 0 |   |
| 2 |   | Πολύ καιρό                                                                             | Μάλλον λιγότερο από όσο συνήθιζα                                                         | 1 |   |
| 1 |   | Όχι τόσο συχνά                                                                         | Σίγουρα λιγότερο από ότι συνήθιζα                                                        | 2 |   |
| 0 |   | Πολύ λίγο                                                                              | Καθόλου                                                                                  | 3 |   |
|   |   | <b>Νιώθω κεφάλτος</b>                                                                  | <b>Αντιμετωπίζω αιφνίδια συναισθήματα πανικού</b>                                        |   |   |
| 3 |   | Ποτέ                                                                                   | Πράγματι πολύ συχνά                                                                      | 3 |   |
| 2 |   | Όχι συχνά                                                                              | Αρκετά συχνά                                                                             | 2 |   |
| 1 |   | Μερικές φορές                                                                          | Όχι τόσο συχνά                                                                           | 1 |   |
| 0 |   | Τον περισσότερο καιρό                                                                  | Καθόλου                                                                                  | 0 |   |
|   |   | <b>Μπορώ να κάθομαι άνετα και να νιώθω χαλαρωμένος</b>                                 | <b>Μπορώ να απολαμβάνω ένα ενδιαφέρον βιβλίο ή ένα ραδιοφωνικό/ τηλεοπτικό πρόγραμμα</b> |   |   |
| 0 |   | Ακριβώς                                                                                | Συχνά                                                                                    | 0 |   |
| 1 |   | Συνήθως                                                                                | Μερικές φορές                                                                            | 1 |   |
| 2 |   | Όχι συχνά                                                                              | Όχι συχνά                                                                                | 2 |   |
| 3 |   | Καθόλου                                                                                | Πολύ σπάνια                                                                              | 3 |   |

**Τώρα ελέγξτε ότι έχετε απαντήσει σε όλες τις ερωτήσεις**

**ΣΥΝΟΛΑ**

A D

Αυτή η φόρμα μπορεί να αναπαραχθεί για χρήση, μέσα στα πλαίσια των κανόνων αγοράς και μόνο σύμφωνα με τους όρους που αναφέρονται στη συμφωνία άδειας από τον εκδότη. HADS copyright © R.P. Snaith and A.S. Zigmond, 1983, 1992, 1994. Τα στοιχεία της φόρμας καταχώρησης έχουν δημοσιευθεί προτοτύπως στην *Acta Psychiatrica Scandinavica*, 67, 361-70, πνευματική ιδιοκτησία© (copyright ©) Munksgaard International Publishers Ltd, Copenhagen, 1983. Δημοσιεύθηκε από την Εταιρία nferNelson Pub. Co. Ltd, 414 Chiswick High Road, London W4 5TF, UK. Με την επιφύλαξη παντός δικαιώματος. Η Εταιρία nferNelson είναι μέλος του ομίλου Granada Learning Limited ανήκει στην Εταιρία ITV plc. HADS Greek.
